# Supplementary material for: Tin-doped NiFe2O4 nanoblocks grown on an iron foil for efficient and stable water splitting at large current densities
Source: Royal Society of Chemistry journal article supplement (doi:10.1039/d3dt03355d), 2023-11-24
Supplement: d3dt03355d1.pdf [file d3dt03355d1.pdf]

## Electronic Supplementary Information

### **Tin-doped NiFe<sub>2</sub>O<sub>4</sub> Nanoblock Grown on Iron Foil for Efficient and Stable Water Splitting at Large-Current-Density**

Juan Jian,<sup>a</sup> Meiting Wang,<sup>a</sup> Zhuo Wang,<sup>a</sup> Jingwen Meng,<sup>a</sup> Yuqin Yang<sup>a</sup> and Limin Chang<sup>a,\*</sup>

<sup>a</sup> Key Laboratory of Preparation and Applications of Environmental Friendly Material of the Ministry of Education, College of Chemistry, Jilin Normal University, Changchun 130103, P. R. China

\* Corresponding authors' E-mails: changlimin2139@163.com

## **1. Material and Experimental Instruments**

### **1.1 Materials used in the experiment**

RuO<sub>2</sub> was synthesized from ruthenium chloride hydrate (RuCl<sub>3</sub>·xH<sub>2</sub>O) purchased from Aladdin Ltd. (Shanghai, China).<sup>[1]</sup> Pt/C (20 wt%) was obtained from Macklin Ltd. (Shanghai, China), Nickel foam (NF) and iron foil (IF) were provided by the Li Yuan Technology Co. Ltd. (Shanxi, China). KOH, Na<sub>2</sub>SnO<sub>3</sub>·3H<sub>2</sub>O, HCl and other chemicals are supplied by the Beijing Chemical Reagents Company. Apart from the NF and IF, all the chemicals are analytical pure and do not need further purification.

### **1.2 Experimental Section**

#### ***Detailed Synthesis Information***

Firstly, weighing 1.0 mmol thiourea and 0.19 mmol sodium stannate; then, mix them into 50 mL deionized water under continuous magnetic stirring; later, transferred the mixture solution into the polytetrafluoroethylene hydrothermal reactor; after that, place the acid treated NF (2 cm \* 5 cm) and sanded IF (1 cm \* 5 cm) into the autoclave; at last, reacted at 220 °C oven for 5 hours. The finally gained IF based material is the Sn-NiFe<sub>2</sub>O<sub>4</sub>/IF and the doped mass percentage of Sn is 1.92 %. In addition, the synthesis path of NiFe<sub>2</sub>O<sub>4</sub>/IF was similar with the Sn-NiFe<sub>2</sub>O<sub>4</sub>/IF, just without the participation of sodium stannate.

#### ***Basic Phase Characterizations***

X-ray diffraction (XRD) experiment was tested on a Rigaku D-Max 2550 diffractometer with Cu-Kα radiation (λ = 1.5418 Å). Scanning electron microscope (SEM) and energy dispersion X-ray spectroscopy (EDX) images were obtained on a JEOL-6700 scanning electron microscope. Transmission electron microscope (TEM), high resolution TEM (HRTEM) images were obtained with microscopy of Philips-FEI Tecnai G2S-Twin, equipped with a field emission gun operating at 200 kV. X-ray photoelectron spectra (XPS) analysis was performed on a VG Scienta R3000 spectrometer with Al Kα (1486.6 eV) as the X-ray source. Contact angle (CA) experiment was analyzed by the machine of Dataphysics OCA20 at room temperature.

#### ***Electrochemical Measurements***

The electrochemical measurements were conducted using the three-electrode system with the electrochemical workstation (CHI 760e). The as-prepared electrodes were directly used as the working electrodes; meanwhile, graphite rod and Hg/HgO electrode were served as counter and reference electrodes, respectively. 1.0 M KOH solution was used as

electrolyte for HER, OER and OWS devices. Potentials were normalized versus the standard hydrogen electrode (RHE) according to formula below:

$$E_{(\text{RHE})} = E_{(\text{Hg}/\text{HgO})} + 0.098 \text{ V} + 0.0591 \text{ pH} \quad (1)$$

Here, “ $E_{(\text{Hg}/\text{HgO})}$ ” is the potential we directly measured during the experiment.

Polarization curves were performed via sweeping potentials at a scan rate of  $2.0 \text{ mV s}^{-1}$ . The measured potentials were calibrated with  $iR$  compensation. Corresponding stability data were examined through current-time curves at the constant potentials.

#### **Tafel slope:**

The data of Tafel slope can be plotted by the gained linear sweep voltammetry (LSV) curves, which is obtained from the follow equation:

$$\eta = a + b \log j \quad (2)$$

Where, “ $\eta$ ” refers to the overpotential; “ $j$ ” is the current density; “ $a$ ” relates to the  $j_0$  (exchange current density) and can be reflected by the intercept; “ $b$ ” is the Tafel slope.

#### **Electrochemical impedance spectroscopy (EIS):**

We operated the ESI testing using the CHI 760e, frequency ranged from 1.0 to 100000 Hz, amplitude is 0.005 V.

#### **Electrochemical active surface area (EASA):**

The EASA was gained follow the formula below:

$$\text{EASA} = A * C_{\text{dl}} / C_s \quad (3)$$

Where “ $A$ ” refers to the area of the working electrode, and we set the electrode area to  $0.25 \text{ cm}^2$  throughout the electrocatalytic water splitting testing; “ $C_s$ ” relates to the electrolyte, here  $C_s = 0.04 \text{ mF cm}^{-2}$ ; “ $C_{\text{dl}}$ ” is the abbreviation of double layer capacitance and calculated from series of CV curves that tested within the non-Faraday potential range ( $0.9254\text{-}1.0254 \text{ V vs. RHE}$ ), scan rate changed from 10 to  $100 \text{ mV s}^{-1}$ , increased with  $10 \text{ mV s}^{-1}$  each time.

#### **Faraday efficiency (FE):**

Faraday efficiency (FE) of Sn-NiFe<sub>2</sub>O<sub>4</sub>/IF for OER/HER can be calculated by the ratio of the amount of O<sub>2</sub>/H<sub>2</sub> collected by drainage method and the theoretical O<sub>2</sub>/H<sub>2</sub>. Take OER for example, the actual amount O<sub>2</sub> production (labeled as  $n_{\text{o-experimental}}$ ) can be calculated using the equation of  $n_{\text{o-experimental}} = V/V_m$ , where  $V$  is the volume of O<sub>2</sub> collected from the chronoamperometry testing;  $V_m$  is molar volume of ideal gas, and  $V_m = 22.4 \text{ L mol}^{-1}$ . For the theoretical O<sub>2</sub> (marked as  $n_{\text{o-theoretical}}$ ) accumulated during the OER. According the OER

equation of  $4\text{OH}^- \rightarrow \text{O}_2 + 2\text{H}_2\text{O} + 4\text{e}^-$ , where, the electrolytic efficiency ( $\eta$ ) can be measured by the equation of  $\eta = z \cdot n \cdot F / Q$ . Here, “ $n$ ” is the mole of  $\text{O}_2$  generated during the OER, and can be marked as  $n_{\text{o-theoretical}}$ ; “ $z$ ” is the number of transferred electrons generated per mole of  $\text{O}_2$  during the OER, here,  $z = 4$ ; “ $F$ ” is the Faraday constant,  $F = 96485 \text{ C mol}^{-1}$ ; “ $Q$ ” refers to the actual quantity of electric charge, and can be calculated by the flume of  $Q = \sum i \cdot t$ . In the chronoamperometry experiment, the  $Q$  can be directly calculated. To evaluate the FE of a catalyst for OER, we assume that 100 % current efficiency occurs during the whole reaction. Hence,  $1 = 4 \cdot F \cdot n_{\text{o-theoretical}} / Q$ , therefore,  $n_{\text{o-theoretical}} = Q / (4 \cdot F)$ . The calculation of FE for HER is similar with the OER, merely the the number of transferred electrons generated per mole of  $\text{H}_2$  during the HER is 2.<sup>[2-4]</sup>

### 3. Supplementary Figures and Tables

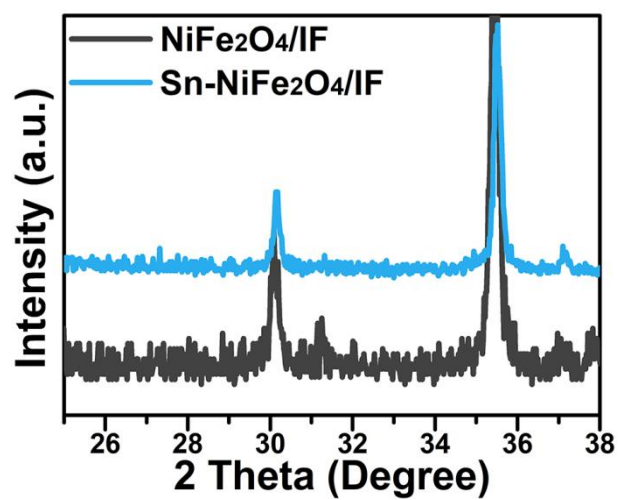

Fig. S1. Enlarged XRD image of NiFe<sub>2</sub>O<sub>4</sub>/IF and Sn-NiFe<sub>2</sub>O<sub>4</sub>/IF.

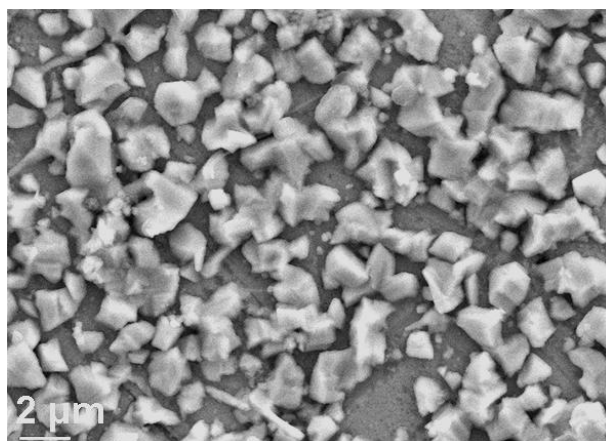

Fig. S2. SEM image of the pure NiFe<sub>2</sub>O<sub>4</sub>/IF.

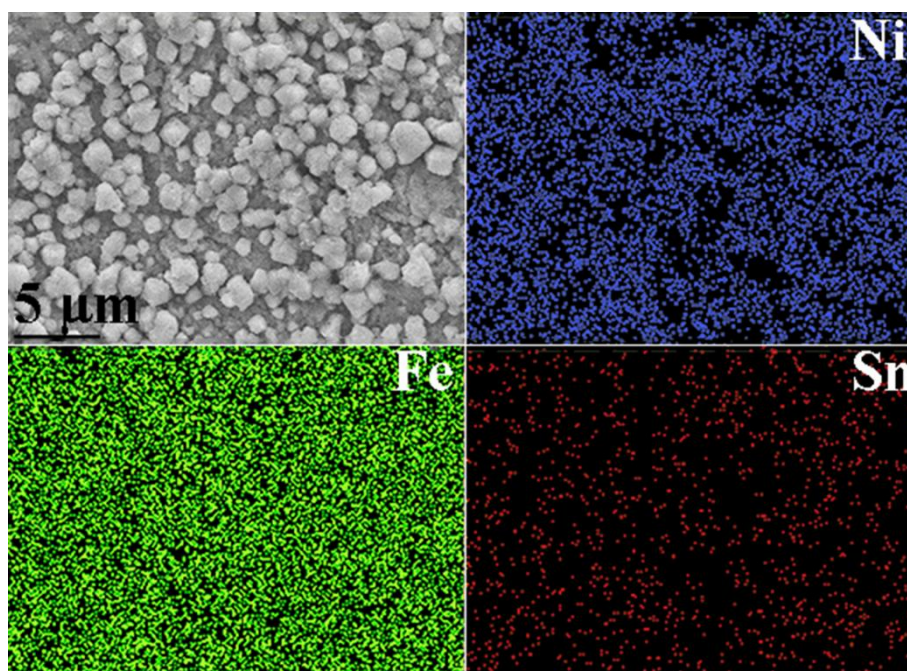

Fig. S3. EDX-Mapping (SEM) results of Ni, Fe, Sn in Sn-NiFe<sub>2</sub>O<sub>4</sub>.

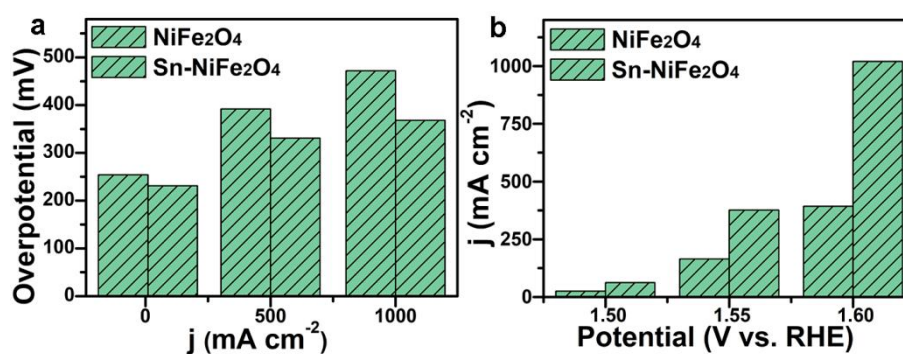

Fig. S4. The bar graph reflecting the relationship between current density and given potential of NiFe<sub>2</sub>O<sub>4</sub>/IF and Sn-NiFe<sub>2</sub>O<sub>4</sub>/IF for the OER course.

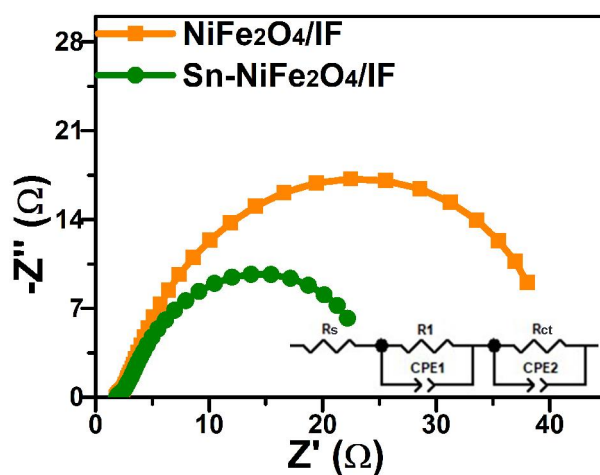

Fig. S5. The electrochemical impedance spectroscopy (EIS) curves of NiFe<sub>2</sub>O<sub>4</sub>/IF and Sn-NiFe<sub>2</sub>O<sub>4</sub>/IF at overpotential of 275 mV, insert is the equivalent circuit for fitting the Nyquist plots.

As illustrated in the equivalent circuit, R represents resistance. Here,  $R_s$  and  $R_{ct}$  refers to the resistance of solution and charge transfer, respectively. It is generally accepted that small  $R_{ct}$  values give rise to rapid charge transfer kinetics. Obviously, the Sn-NiFe<sub>2</sub>O<sub>4</sub>/IF (11.2  $\Omega$ ) has much lower charge transfer resistance than the pure NiFe<sub>2</sub>O<sub>4</sub>/IF (19.4  $\Omega$ ). Thus, the doped-Sn shortened the charge transfer path and accelerated the electrocatalytic reactions of Sn-NiFe<sub>2</sub>O<sub>4</sub>/IF.

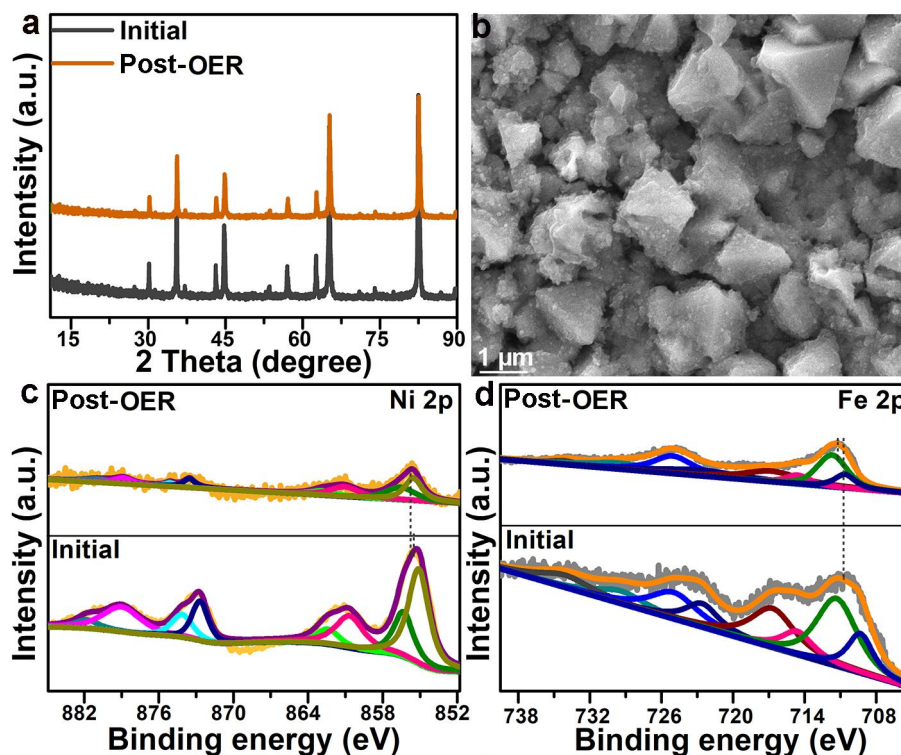

**Fig. S6.** The basic characterization results of (a) XRD, (b) SEM and (c, d) XPS data of Ni 2p, Fe 2p that post-OER for Sn-NiFe<sub>2</sub>O<sub>4</sub>/IF.

The slightly high binding energy shift of Ni 2p and Fe 2p after the OER, which maybe due to the accumulation of oxyhydroxide species.<sup>[5,6]</sup>

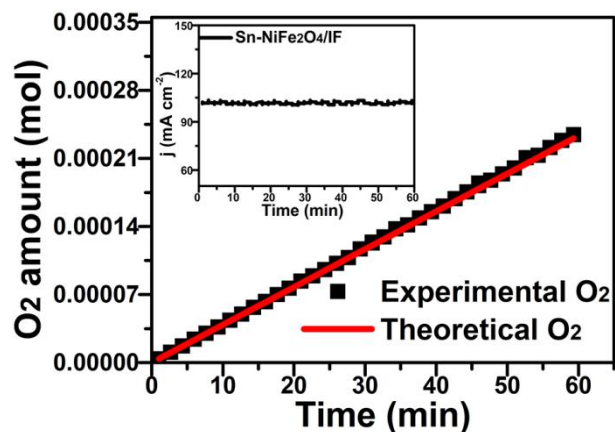

**Fig. S7.** Faraday efficiency image of Sn-NiFe<sub>2</sub>O<sub>4</sub>/IF during the OER course, the insert graph is the corresponding i-t test.

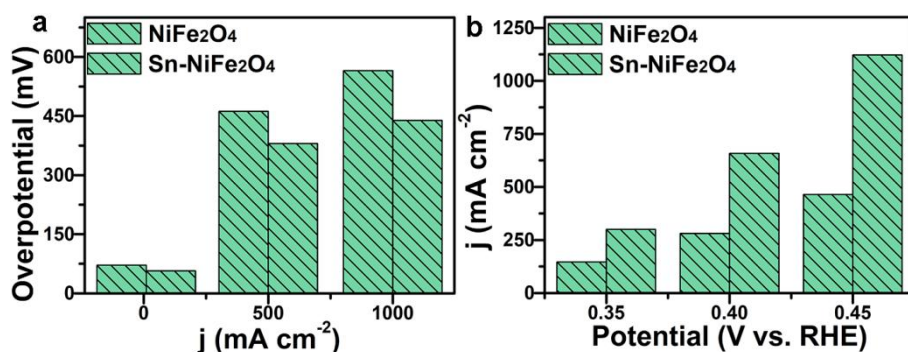

**Fig. S8.** The bar graph reflecting the relationship between current density and given potential of NiFe<sub>2</sub>O<sub>4</sub>/IF and Sn-NiFe<sub>2</sub>O<sub>4</sub>/IF for the HER process.

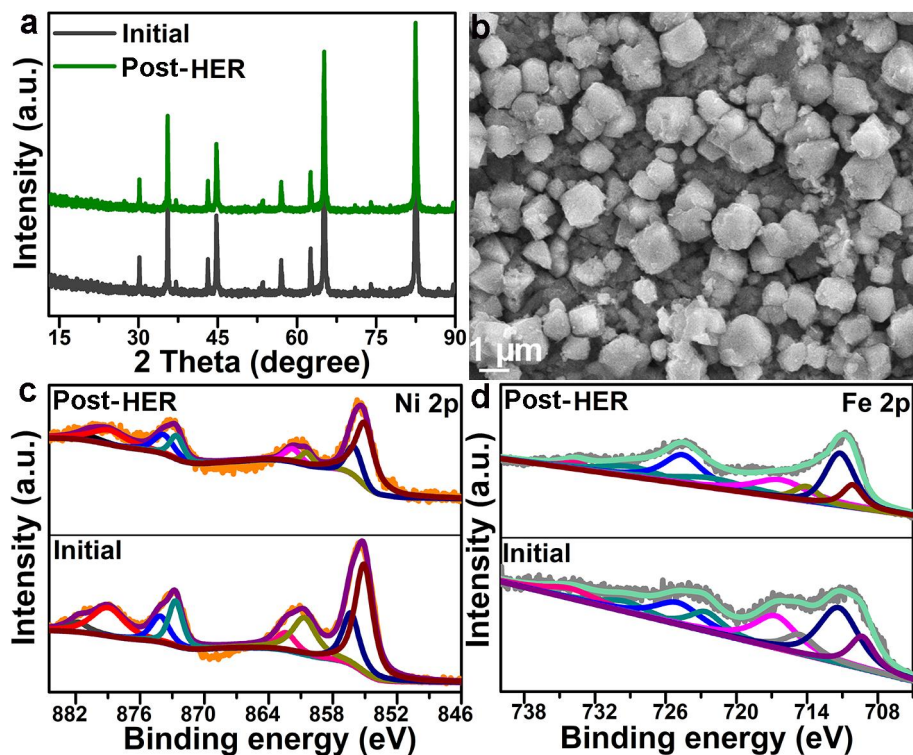

**Fig. S9.** The basic characterization results of (a) XRD, (b) SEM and (c, d) XPS data of Ni 2p, Fe 2p that post-HER for Sn-NiFe<sub>2</sub>O<sub>4</sub>/IF.



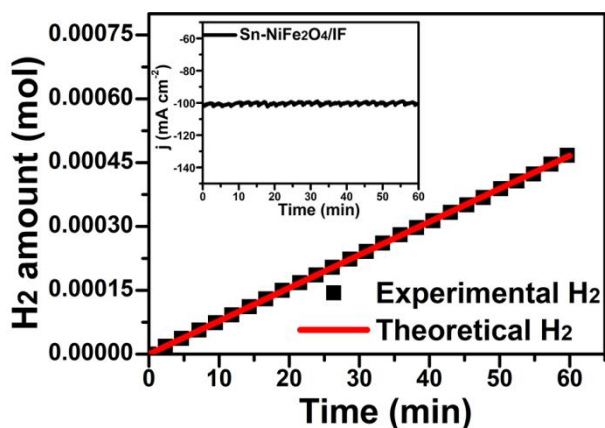

**Fig. S10.** Faraday efficiency result of Sn-NiFe<sub>2</sub>O<sub>4</sub>/IF for HER, wherein the insert image is the corresponding i-t curves.

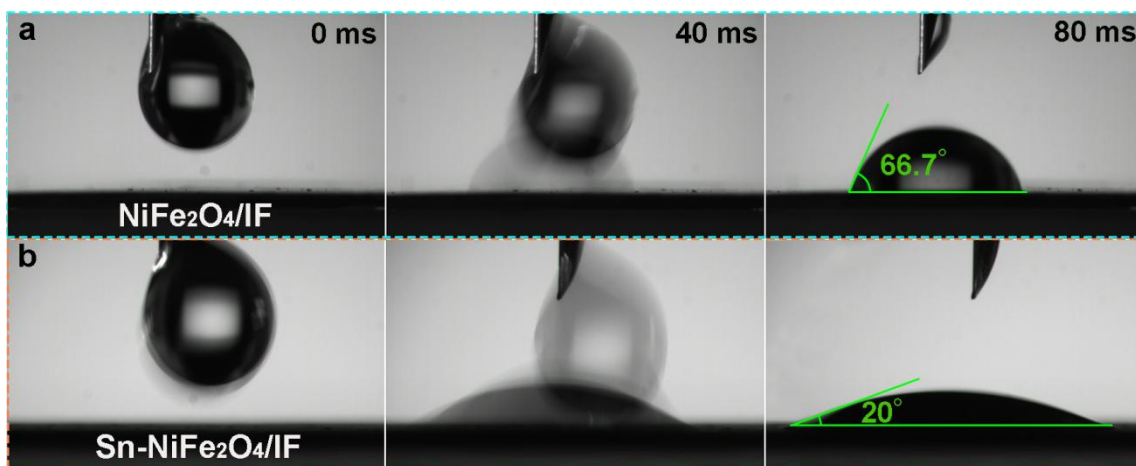

**Fig. S11.** Contact angle experiment of (a) NiFe<sub>2</sub>O<sub>4</sub>/IF and (b) Sn-NiFe<sub>2</sub>O<sub>4</sub>/IF at measure time of 0, 40 and 80 ms.

**Table S1.** A properties comparison of various electrocatalysts for overall water splitting (OWS).

| Catalys (OWS)                                                  | Voltage at 10 mA cm <sup>-2</sup> (V) | Voltage at 100 mA cm <sup>-2</sup> (V) | Reference |
|----------------------------------------------------------------|---------------------------------------|----------------------------------------|-----------|
| Sn-NiFe <sub>2</sub> O <sub>4</sub> /IF                        | 1.56                                  | 1.80                                   | This work |
| NiFe <sub>2</sub> O <sub>4</sub> /IF                           | 1.68                                  | 1.94                                   | This work |
| Pt/C  RuO <sub>2</sub>                                         | 1.56                                  | 1.81                                   | This work |
| Fe <sub>2</sub> O <sub>3</sub> /Ni <sub>3</sub> S <sub>2</sub> | 1.54                                  | ≈1.81                                  | [7]       |
| CoMoP                                                          | 1.56                                  | 1.70                                   | [8]       |
| S-NiFe <sub>2</sub> O <sub>4</sub> /Ni <sub>3</sub> Fe/NW      | 1.52                                  | 1.79                                   | [9]       |
| Co/CNFs                                                        | 1.60                                  | —                                      | [10]      |

|                                                                    |      |       |      |
|--------------------------------------------------------------------|------|-------|------|
| Co <sub>9</sub> S <sub>8</sub> /Ni <sub>3</sub> S <sub>2</sub> /NF | 1.64 | ---   | [11] |
| CoMoO nanosheet arrays@NF                                          | 1.68 | ≈1.88 | [12] |
| Ni <sub>3</sub> FeN/r-GO                                           | 1.60 | ≈1.96 | [13] |
| P-Co <sub>3</sub> O <sub>4</sub> /NF                               | 1.63 | ---   | [14] |
| CoP@3D Ti <sub>3</sub> C <sub>2</sub> -Mxene                       | 1.57 | ≈1.70 | [15] |
| P-doped Co-Ni-S/NF                                                 | 1.60 | ---   | [16] |
| RuO <sub>2</sub> /NiO/NF                                           | 1.50 | ---   | [17] |
| Fe-Ni <sub>2</sub> P                                               | 1.49 | ≈1.73 | [18] |
| Ni <sub>3</sub> S <sub>2</sub> -NGQDs/NF                           | 1.58 | ---   | [19] |
| NiFe/Ni(OH) <sub>2</sub> /NiAl                                     | 1.59 | ---   | [20] |
| MoP/Ni <sub>2</sub> P/NF                                           | 1.55 | ---   | [21] |
| N(P)-doped 304-type stainless steel mesh                           | 1.74 | ---   | [22] |
| Cu@CoS <sub>x</sub> /Cu Foam                                       | 1.50 | 1.80  | [23] |
| CoFePO/NF                                                          | 1.56 | ≈1.95 | [24] |
| N-Ni <sub>3</sub> S <sub>2</sub> /NF                               | 1.48 | ≈1.83 | [25] |
| NiCo <sub>2</sub> S <sub>4</sub> nanowire arrays                   | 1.63 | ---   | [26] |
| NiFeOOH                                                            | ---  | 1.49  | [27] |
| CP/CTs/Co-S                                                        | 1.74 | ---   | [28] |
| NiCoP                                                              | 1.58 | ≈1.81 | [29] |
| CoFeZr oxides/NF                                                   | 1.63 | ≈1.80 | [30] |
| MoS <sub>2</sub> -NiS <sub>2</sub> /NGF                            | 1.64 | ---   | [31] |
| Ni-graphitic carbon (NGC)                                          | 1.64 | ---   | [32] |
| MoO <sub>3</sub> /Ni-NiO                                           | 1.55 | ---   | [33] |
| Ni@NC800/NF                                                        | 1.60 | ---   | [34] |
| Ni <sub>1-x</sub> Fe <sub>x</sub> /NC/NF                           | 1.58 | ---   | [35] |

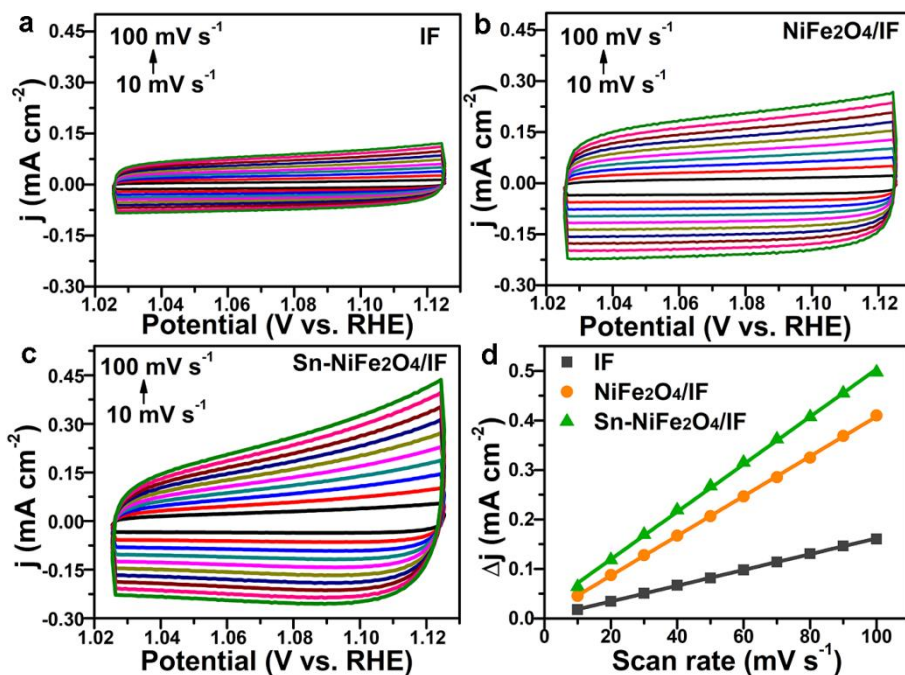

**Fig. S12.** CV curves at different scan rates of (a) IF, (b) NiFe<sub>2</sub>O<sub>4</sub>/IF, (c) Sn-NiFe<sub>2</sub>O<sub>4</sub>/IF and their (d) relationship curves between  $\Delta j$  and scan rates.

**Table S2.** Information of  $C_{dl}$ ,  $C_s$  and EASA of the IF, NiFe<sub>2</sub>O<sub>4</sub>/IF and Sn-NiFe<sub>2</sub>O<sub>4</sub>/IF.

|                                                              | IF                    | NiFe <sub>2</sub> O <sub>4</sub> /IF | Sn-NiFe <sub>2</sub> O <sub>4</sub> /IF |
|--------------------------------------------------------------|-----------------------|--------------------------------------|-----------------------------------------|
| Fitted slope (mF cm <sup>-2</sup> )                          | 0.0016                | 0.0041                               | 0.0048                                  |
| Standard error for slope                                     | 8.64*10 <sup>-6</sup> | 1.75*10 <sup>-5</sup>                | 4.75*10 <sup>-5</sup>                   |
| Double-layer-capacitance ( $C_{dl}$ , mF cm <sup>-2</sup> )  | 0.80                  | 2.05                                 | 2.40                                    |
| General specific capacitance ( $C_s$ , mF cm <sup>-2</sup> ) | 0.04                  | 0.04                                 | 0.04                                    |
| Electrochemical active surface area (EASA, cm <sup>2</sup> ) | 5.00                  | 12.8                                 | 15.0                                    |

#### 4. Reference

- [1] Jian, J.; Yuan, H. M.; Feng, S. H. et al. *ACS Appl. Mater. Inter.*, **2018**, 10, 40568.
- [2] Liu, Y. P.; Zou, X. X. et al, *Nat. Commun.*, **2018**, 9, 2609.
- [3] Suryanto, B. H. R.; Zhao, C. et al, *Nat. Commun.*, **2019**, 10, 5599.
- [4] Zou, X. X.; Zhang Y. *Chem. Soc. Rev.*, **2015**, 44, 5148-5180.

- [5] Liu, J. L.; et al. *Chem. Commun.*, **2019**, 55, 10860-10863.
- [6] Liu, Z.; et al. *Chem. Eng. J.*, **2020**, 395, 125170.
- [7] Shao, Z. Y.; Wang, Q. *Chem. Eng. J.*, **2021**, 416, 129098.
- [8] Wang, X.; Cabot, A. *Nanomaterials*, **2022**, 12, 1098.
- [9] Gao, M. Y.; Xu, C. Y. *J. Mater. Chem. A*, **2018**, 6, 1551-1560.
- [10] Yang, Z. K.; Li, Y. D. et al. *Adv. Mater.*, **2019**, 31, 1808043.
- [11] Du, Feng.; Shi, L.; Zou, Z. G. et al. *Appl. Catal., B* **2019**, 253, 246.
- [12] Zhang, Y.; Shao, Q.; Huang, X. Q. et al. *Nano Energy*, **2018**, 45, 448.
- [13] Gu, Y.; Chen, S.; Yao, X. D. et al. *ACS Nano*, **2018**, 12, 245.
- [14] Wang, Z. C.; Liu, H. L.; Sun, X. P. et al. *ACS Catal.*, **2018**, 8, 2236.
- [15] Xiu, L. Y.; Wang, Z. Y.; Qiu, J. S. et al. *ACS Nano*, **2018**, 12, 8017.
- [16] Zhang, F. F.; Ge, Y. C.; Shen, J. F. et al. *ACS Appl. Mater. Inter.*, **2018**, 10, 7087.
- [17] Liu, J. S.; Zheng, Y.; Qiao, S. -Z. et al. *Small*, **2018**, 14, 1704073.
- [18] Li, Y. J.; Zhang, H. C.; Sun, X. M. et al. *Adv. Funct. Mater.*, **2017**, 27, 1702513.
- [19] Lv, J. J.; Zhao, J.; Zhu, J. J. et al. *Small*, **2017**, 13,1700264.
- [20] Niu, S.; Jiang, W. -J.; Hu, J. -S. et al. *Adv. Sci.*, **2017**, 4, 1700084.
- [21] Du, C. C.; Shang, M. X.; Song W. B. et al. *J. Mater. Chem. A*, **2017**, 5, 15940.
- [22] Balogun, M. -S.; Qiu, W. T.; Tong, Y. X. et al. *Adv. Mater.*, **2017**, 1702095.
- [23] Liu, Y. P.; Li, Q. J.; Zou, X. X. et al. *Adv.Mater.*, **2017**, 29, 1606200.
- [24] Duan, J. J.; Chen, S.; Qiao, S. Z. et al. *ACS Nano*, **2016**, 10, 8738.
- [25] Chen, P. Z.; Zhou, T. P.; Xie, Y. et al. *Adv. Mater.*, **2017**, 29, 1701584.
- [26] Sivanantham, A.; Ganesan, P.; Shanmugam, S. *Adv. Funct. Mater.*, **2016**, 26, 4661.
- [27] Zhou, H. Q.; Yu, F.; Ren, Z. F. et al. *Energy Environ. Sci.*, **2018**, 11, 2858.
- [28] Wang, J.; Zhong, H. -X.; Zhang, X. -B. et al. *ACS Nano*, **2016**, 10, 2342.

- [29] Liang, H. F.; Gandi, A. N.; Alshareef, H. N. et al. *Nano Lett.*, **2016**, 16, 7718.
- [30] Huang, L. L.; Chen, D. W.; Wang, S. Y. et al. *Adv. Mater.*, **2019**, 1901439.
- [31] Kuang, P. Y.; He, M.; Fan, K. et al. *Appl. Catal., B*, **2019**, 254, 15.
- [32] Zhou, B. H.; Zhang, M. C.; Zhang, Y. Y. et al. *Carbon*, **2019**, 150, 21.
- [33] Li, X. P.; Wang, Y.; Hu, W. B. et al. *Adv. Mater.*, **2020**, 32, 2003414.
- [34] Xu, Y.; Tu, W. G.; Xu, R. et al. *Adv. Mater.*, **2017**, 29, 1605957.
- [35] Zhang, X.; Xu, H. M.; Liang, Y. Y. et al. *ACS Catal.*, **2016**, 6, 580.
